# Supplementary material for: Evidence of a chimpanzee-sized ancestor of humans but a gibbon-sized ancestor of apes
Source: Springer Nature journal article supplement (doi:10.1038/s41467-017-00997-4), 2017-10-06
Supplement: 41467_2017_997_MOESM1_ESM.pdf [file 41467_2017_997_MOESM1_ESM.pdf]

Supplementary Note 1:

The taxonomic scheme in this manuscript follows:

Superfamily Hominoidea (hominoids)

Family Proconsulidae

Genus *Proconsul*

Genus *Ekembo*

Family Pliobatidae

Genus *Pliobates*

Family Hylobatidae (hylobatids)

Genus *Hylobates*

Family Hominidae (hominids)

Subfamily Dryopithecinae

Genus *Dryopithecus*

Genus *Hispanopithecus*

Subfamily Ponginae (pongines)

Genus *Pongo*

Genus *Sivapithecus*

Subfamily Homininae (hominines)

Tribe Gorillini (gorillins)

Genus *Gorilla*

Tribe Panini (panins)

Genus *Pan*

Tribe Hominini (hominins)

Genus *Orrorin*\*

Genus *Sahelanthropus*\*

Genus *Ardipithecus*\*

Genus *Australopithecus*

Genus *Paranthropus*

Genus *Homo*

\* putative basal hominin

Supplementary Table 1: Estimated body mass averages, first appearance dates, sample sizes, and references for fossil taxa included in this analysis, along with comparative data for modern humans, *Pan troglodytes*, and *Pan paniscus*.

| Species                                 | Average Body Mass (kg) | First Appearance Date (Ma) | Sample size     | Family                     | Reference for Mass                                                     | Reference for Age                        |
|-----------------------------------------|------------------------|----------------------------|-----------------|----------------------------|------------------------------------------------------------------------|------------------------------------------|
| <i>Orrorin tugenensis</i> <sup>α</sup>  | 35.8/46.5              | 6.00                       | 2               | Hominidae                  | Grabowski et al. 2015 <sup>1</sup> / Almécija et al. 2015 <sup>2</sup> | Almécija et al. 2013 <sup>16</sup>       |
| <i>Ar. ramidus</i> <sup>α</sup>         | 32.1/50.8              | 4.40                       | 1               | Hominidae                  | Grabowski et al. 2015 <sup>1</sup> / Almécija et al. 2015 <sup>2</sup> | White et al. 2009 <sup>18</sup>          |
| <i>Au. anamensis</i>                    | 46.30                  | 4.17                       | 1               | Hominidae                  | Grabowski et al. 2015 <sup>1</sup>                                     | Leakey et al. 1998 <sup>18</sup>         |
| <i>Au. afarensis</i>                    | 39.10                  | 3.77                       | 12              | Hominidae                  | Grabowski et al. 2015 <sup>1</sup>                                     | Leakey et al. 1976 <sup>19</sup>         |
| <i>Au. africanus</i>                    | 30.50                  | 3.03                       | 5               | Hominidae                  | Grabowski et al. 2015 <sup>1</sup>                                     | Herries et al. 2013 <sup>20</sup>        |
| <i>Au. sediba</i>                       | 26.70                  | 1.95                       | 2               | Hominidae                  | Grabowski et al. 2015 <sup>1</sup>                                     | Pickering et al. 2011 <sup>21</sup>      |
| <i>P. boisei</i> <sup>β</sup>           | 35.30                  | 2.30                       | 8               | Hominidae                  | Grabowski et al. 2015 <sup>1</sup>                                     | Feibel et al. 1989 <sup>22</sup>         |
| <i>P. robustus</i>                      | 30.10                  | 2.00                       | 4               | Hominidae                  | Grabowski et al. 2015 <sup>1</sup>                                     | Herries et al. 2009 <sup>23</sup>        |
| <i>H. habilis</i>                       | 32.60                  | 2.33                       | 2               | Hominidae                  | Grabowski et al. 2015 <sup>1</sup>                                     | Kimbel et al. 1997 <sup>24</sup>         |
| <i>H. erectus</i>                       | 51.00                  | 1.90                       | 7               | Hominidae                  | Grabowski et al. 2015 <sup>1</sup>                                     | Kimbel and Villmoare, 2016 <sup>25</sup> |
| <i>H. floresiensis</i>                  | 27.50                  | 0.10                       | 1               | Hominidae                  | Grabowski et al. 2015 <sup>1</sup>                                     | Sutikna et al. 2016 <sup>26</sup>        |
| <i>H. heidelbergensis</i>               | 69.10                  | 0.61                       | 5               | Hominidae                  | Arsuaga et al. 2015 <sup>3</sup>                                       | Wagner et al. 2010 <sup>27</sup>         |
| <i>H. neanderthalensis</i>              | 75.40                  | 0.13                       | 14              | Hominidae                  | Arsuaga et al. 2015 <sup>3</sup>                                       | Rink et al. 1995 <sup>28</sup>           |
| Modern Humans                           | 58.20                  | 0.20                       | 51 <sup>ε</sup> | Hominidae                  | Ruff et al. 1997 <sup>4</sup>                                          | McDougall et al. 1995 <sup>29</sup>      |
| <i>Proconsul africanus</i> <sup>δ</sup> | 35.00                  | 22.50                      | -               | Proconsulidae <sup>φ</sup> | Harrison 2010 <sup>5</sup>                                             | McNulty et al. 2015 <sup>30</sup>        |
| <i>Proconsul major</i> <sup>δ</sup>     | 75.00                  | 22.50                      | -               | Proconsulidae <sup>φ</sup> | Harrison 2010 <sup>5</sup>                                             | McNulty et al. 2015 <sup>30</sup>        |
| <i>Ekembo heseloni</i> <sup>δ</sup>     | 15.00                  | 18.50                      | -               | Proconsulidae <sup>φ</sup> | Harrison 2010 <sup>5</sup>                                             | McNulty et al. 2015 <sup>30</sup>        |
| <i>Ekembo nyanzae</i> <sup>δ</sup>      | 35.00                  | 18.50                      | -               | Proconsulidae <sup>ν</sup> | Harrison 2010 <sup>5</sup>                                             | McNulty et al. 2015 <sup>30</sup>        |
| <i>Dryopithecus fontani</i>             | 43.60                  | 11.80                      | 1               | Hominidae <sup>φ</sup>     | Moya-Sola et al. 2009 <sup>6</sup>                                     | Moya-Sola et al. 2009 <sup>6</sup>       |
| <i>Hispanopithecus laietanus</i>        | 32.00                  | 9.60                       | 2               | Hominidae <sup>φ</sup>     | Alba et al. 2012 <sup>7</sup>                                          | Alba et al. 2012 <sup>7</sup>            |
| <i>Sivapithecus indicus</i>             | 30.50                  | 12.70                      | 6               | Hominidae <sup>φ</sup>     | Morgan et al. 2015 <sup>8</sup>                                        | Morgan et al. 2015 <sup>8</sup>          |
| <i>Pliobates cataloniae</i>             | 4.50                   | 11.60                      | 1               | Pliobatidae                | Alba et al. 2015 <sup>9</sup>                                          | Alba et al. 2015 <sup>9</sup>            |

|                                   |                   |       |    |                 |                                          |                                    |
|-----------------------------------|-------------------|-------|----|-----------------|------------------------------------------|------------------------------------|
| <i>Komba robustus</i>             | 0.30              | 20.00 | -  | Galagidae       | Steiper and Seiffert, 2012 <sup>10</sup> | Harrison, 2010 <sup>5</sup>        |
| <i>Nycticeboides simpsoni</i>     | 0.27              | 9.00  | -  | Lorisidae       | Steiper and Seiffert, 2012 <sup>10</sup> | Harrison, 2010 <sup>5</sup>        |
| <i>Epipliothecus vindobonensi</i> | 11.50             | 15.50 | 1  | Pliopithecidae  | Alba et al. 2015 <sup>9</sup>            | Begun, 2002 <sup>31</sup>          |
| <i>Carlocebus carmenensis</i>     | 3.37              | 17.50 | -  | Pitheciidae     | Steiper and Seiffert, 2012 <sup>10</sup> | Fleagle, 2013 <sup>32</sup>        |
| <i>Branisella boliviana</i>       | 0.48              | 26.00 | -  | incertae sedis  | Steiper and Seiffert, 2012 <sup>10</sup> | Takai et al. 2000 <sup>33</sup>    |
| <i>Karanisia clarki</i>           | 0.27              | 41.00 | 1  | Galagidae       | Seiffert et al. 2003 <sup>11</sup>       | Harrison, 2010 <sup>5</sup>        |
| <i>Victoriapithecus macinnesi</i> | 3.75 <sup>3</sup> | 15.00 | -  | Cercopithecidae | Harrison, 1989 <sup>12</sup>             | Gonzales et al. 2015 <sup>34</sup> |
| <i>Archicebus achilles</i>        | 0.03              | 55.80 | 1  | Archicebidae    | Ni et al. 2013 <sup>13</sup>             | Ni et al. 2013 <sup>13</sup>       |
| <i>Eosimias sinensis</i>          | 0.14              | 45.00 | 1  | Eosimiidae      | Egi et al. 2004 <sup>14</sup>            | Beard and Wang. 2004 <sup>35</sup> |
| <i>Pan troglodytes</i>            | 45.00             | 2.33  | 60 | Hominidae       | Smith and Jungers 1997 <sup>15</sup>     | 10K Trees <sup>36</sup>            |
| <i>Pan paniscus</i>               | 39.10             | 2.33  | 13 | Hominidae       | Smith and Jungers 1997 <sup>15</sup>     | 10K Trees <sup>36</sup>            |

$\alpha$  From <sup>1</sup>/Based on chimpanzee training sample from <sup>2</sup>

$\beta$  Based on "Possible *P. boisei*" following <sup>1</sup>

$\delta$  Midpoint of range compiled in <sup>5</sup>

$\varepsilon$  Average of 51 worldwide populations

$\phi$  Following <sup>6</sup>

Supplementary Table 2: AIC<sub>c</sub> results and comparison between models for different evolutionary hypotheses including Brownian-motion (BM), a single regime OU model (OU1), a chimpanzee sized ancestor of all hominoids (*Anc\_Pan*), and the best supported model (Surface fit) for different subsets of body mass data. Also shown is half-life ( $t_{1/2}$ ) for each data set for the best-supported model.

| Data Set                                                                                | Evolutionary Model    | AIC <sub>c</sub> | Change AIC <sub>c</sub> | $t_{1/2}$ |
|-----------------------------------------------------------------------------------------|-----------------------|------------------|-------------------------|-----------|
| <b>Complete Data Set with Smaller <i>Ardipithecus</i> and Orrorin Estimates (n=87)</b>  | <b>BM</b>             | 1999.38          | 330.12                  |           |
|                                                                                         | <b>OU1</b>            | 1969.42          | 300.16                  |           |
|                                                                                         | <b><i>Anc_Pan</i></b> | 1680.79          | 11.52                   |           |
|                                                                                         | <b>Surface fit</b>    | 1669.27          | 0.00                    | 0.82      |
| <b>Without Miocene Apes (n=79)</b>                                                      | <b>BM</b>             | 1759.10          | 263.06                  |           |
|                                                                                         | <b>OU1</b>            | 1753.11          | 257.07                  |           |
|                                                                                         | <b><i>Anc_Pan</i></b> | 1500.62          | 4.59                    |           |
|                                                                                         | <b>Surface fit</b>    | 1496.04          | 0.00                    | 0.85      |
| <b>Female Data Only - Well Sampled Early Hominins with other Fossil Primates (n=78)</b> | <b>BM</b>             | 1711.95          | 258.52                  |           |
|                                                                                         | <b>OU1</b>            | 1700.86          | 247.43                  |           |
|                                                                                         | <b><i>Anc_Pan</i></b> | 1502.52          | 49.10                   |           |
|                                                                                         | <b>Surface fit</b>    | 1453.42          | 0.00                    | 6.52      |
| <b>Female Data Only - Extant Primates (n=57)</b>                                        | <b>BM</b>             | 1233.95          | 177.33                  |           |
|                                                                                         | <b>OU1</b>            | 1232.95          | 176.33                  |           |
|                                                                                         | <b><i>Anc_Pan</i></b> | 1068.79          | 12.18                   |           |
|                                                                                         | <b>Surface fit</b>    | 1056.62          | 0.00                    | 10.10     |

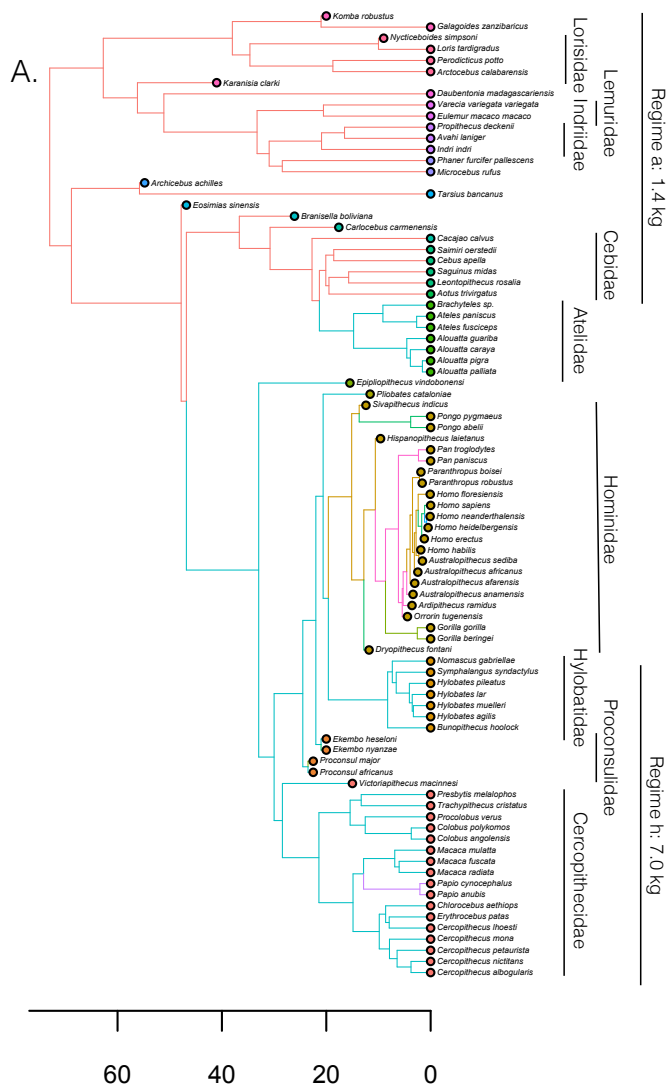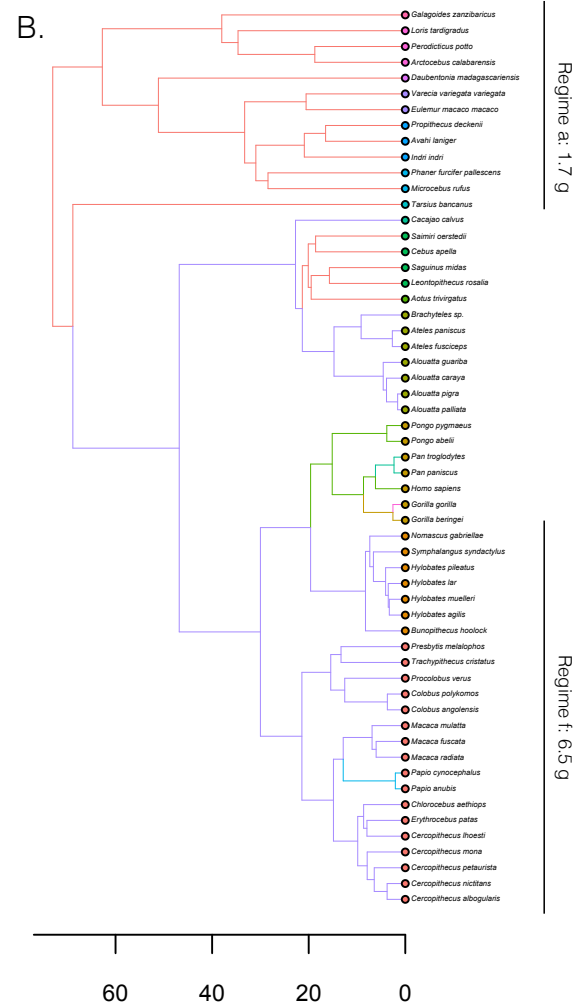

Supplementary Figure 1: A) Same as Figure 1:A except with species names; B) Same as Figure 1:A except using only extant primate data.

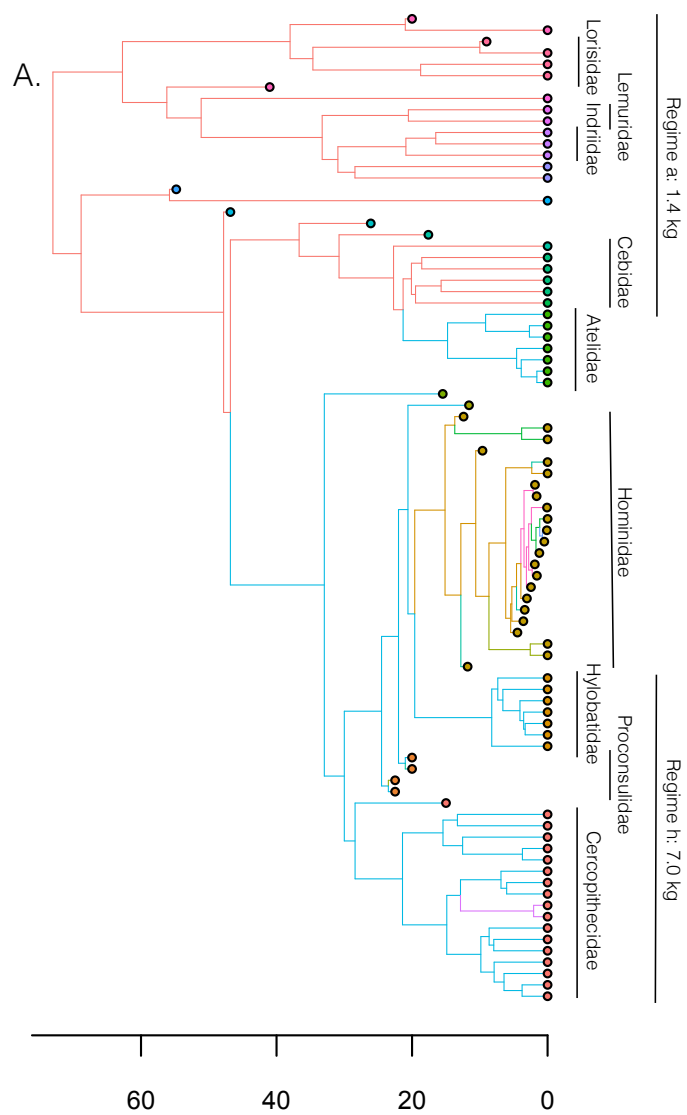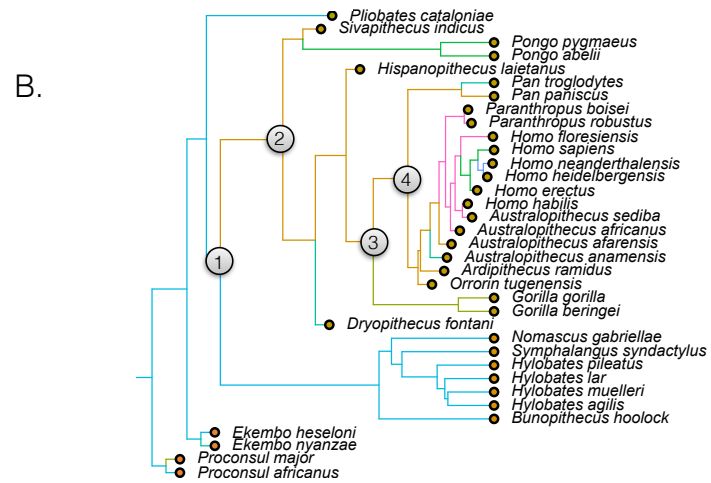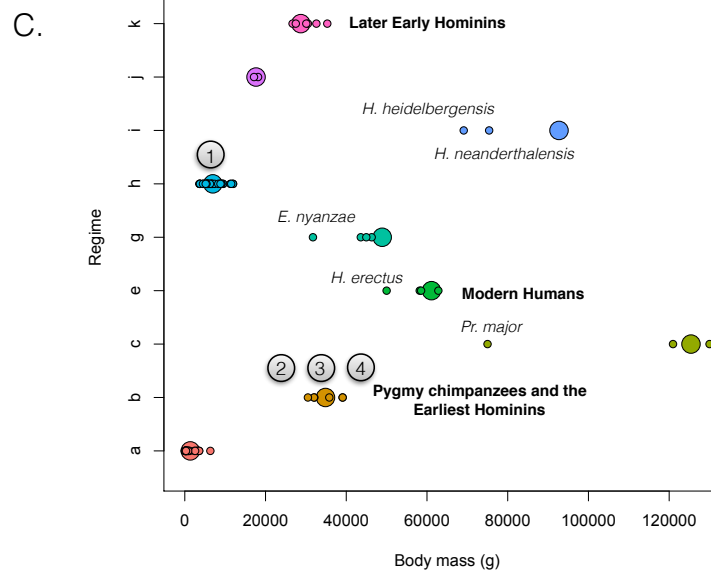

Supplementary Figure 2: Same as Figure 1 but using with smaller estimates of *Ardipithecus* and *Orrorin*.

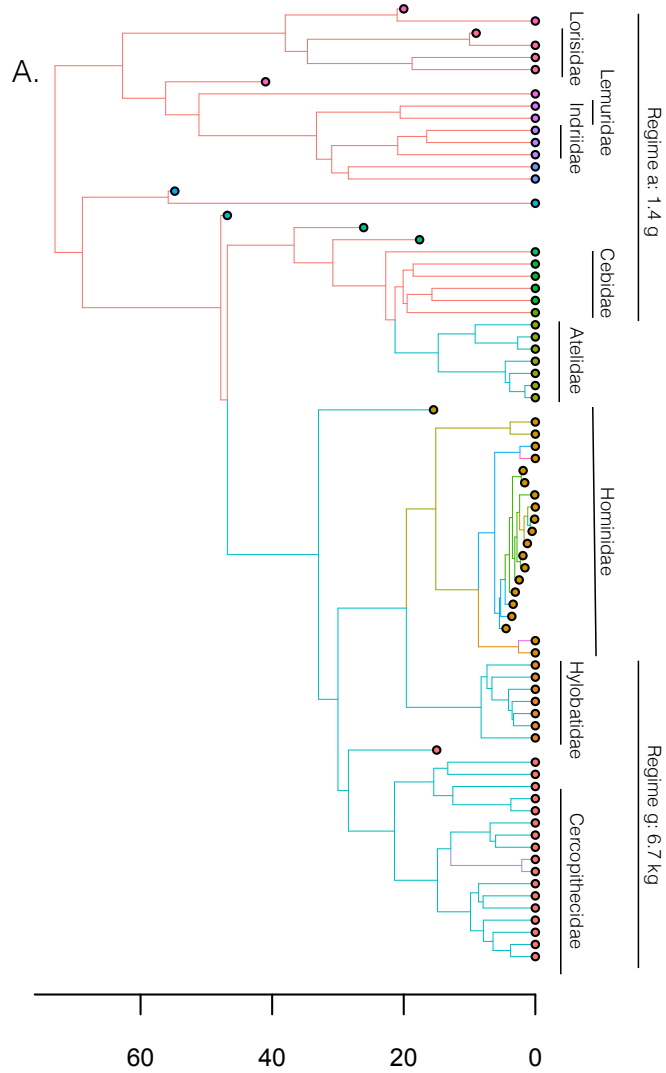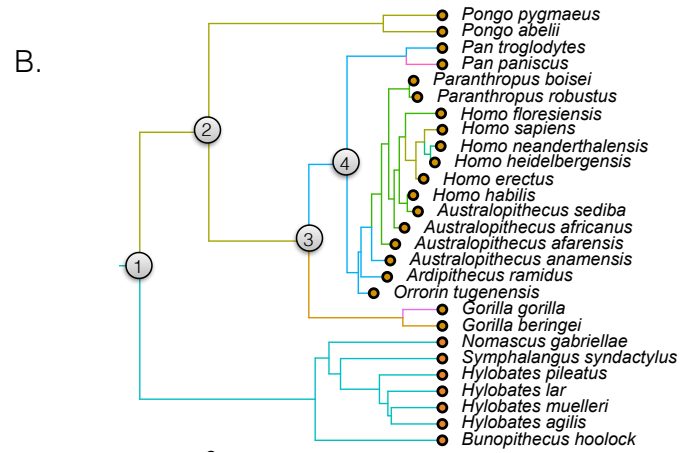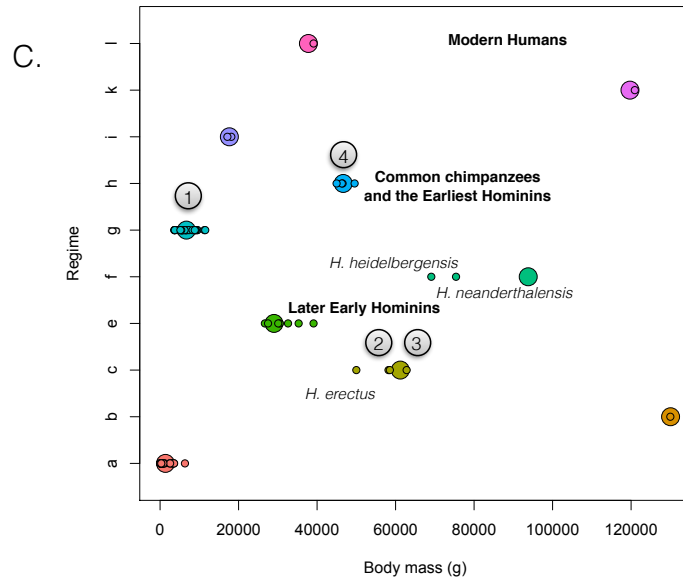

Supplementary Figure 3: Same as Figure 1 but without Miocene fossil apes.

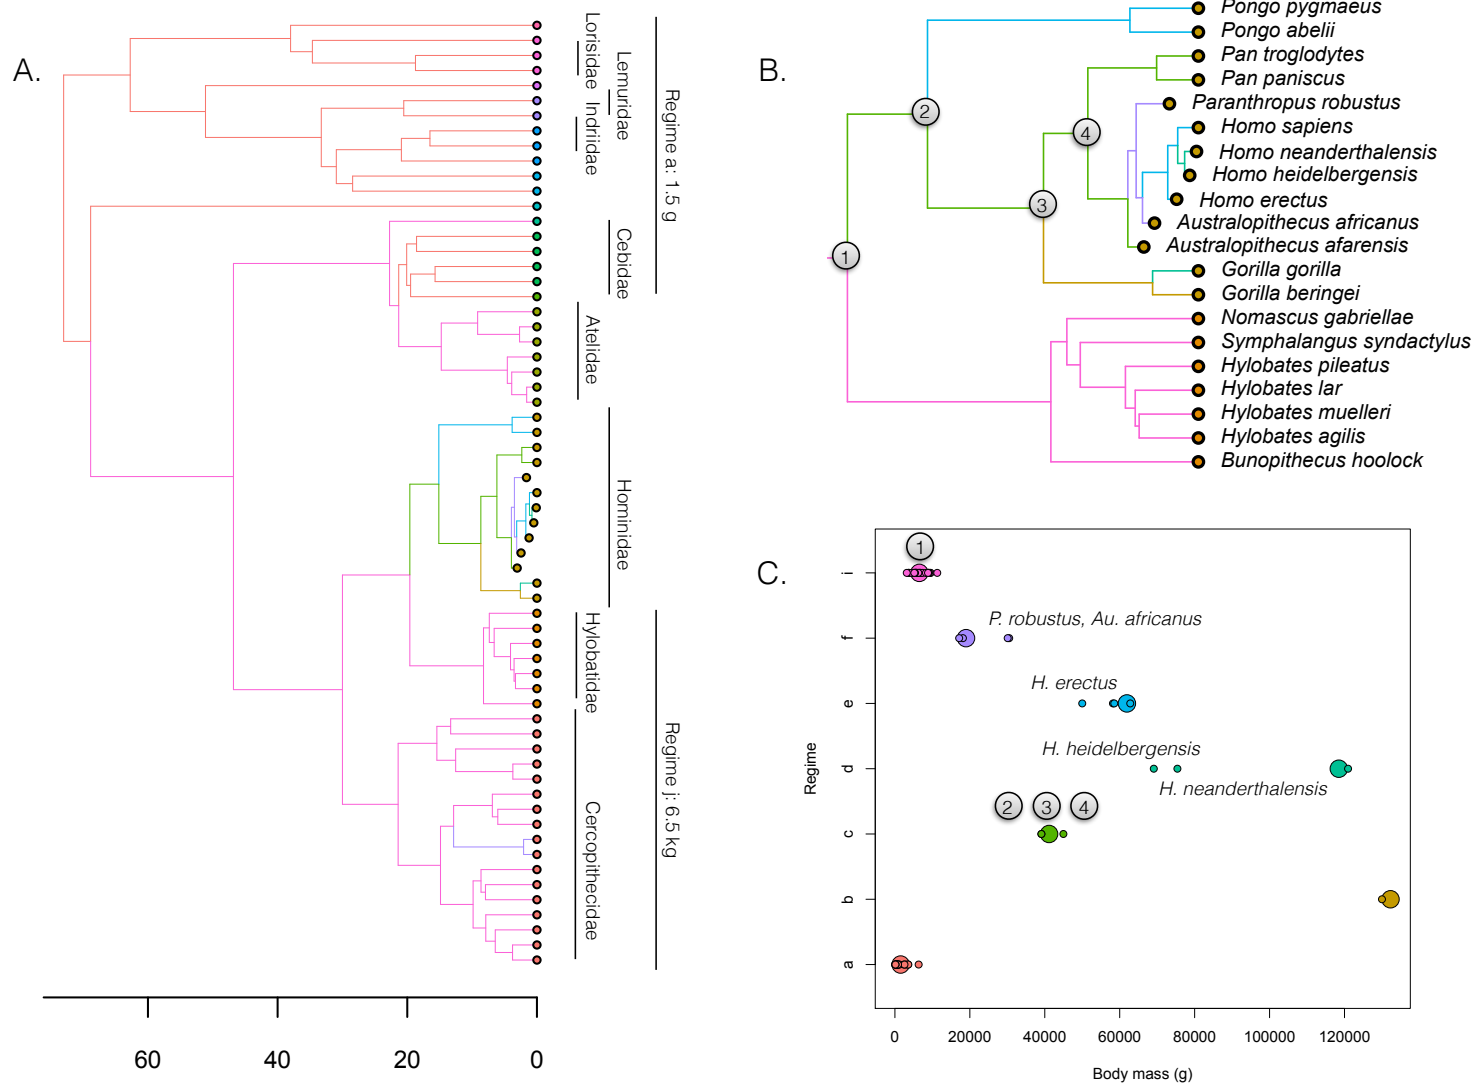

Supplementary Figure 4: Same as Figure 1 but with only well-sampled undisputed early hominins without other fossil primates.



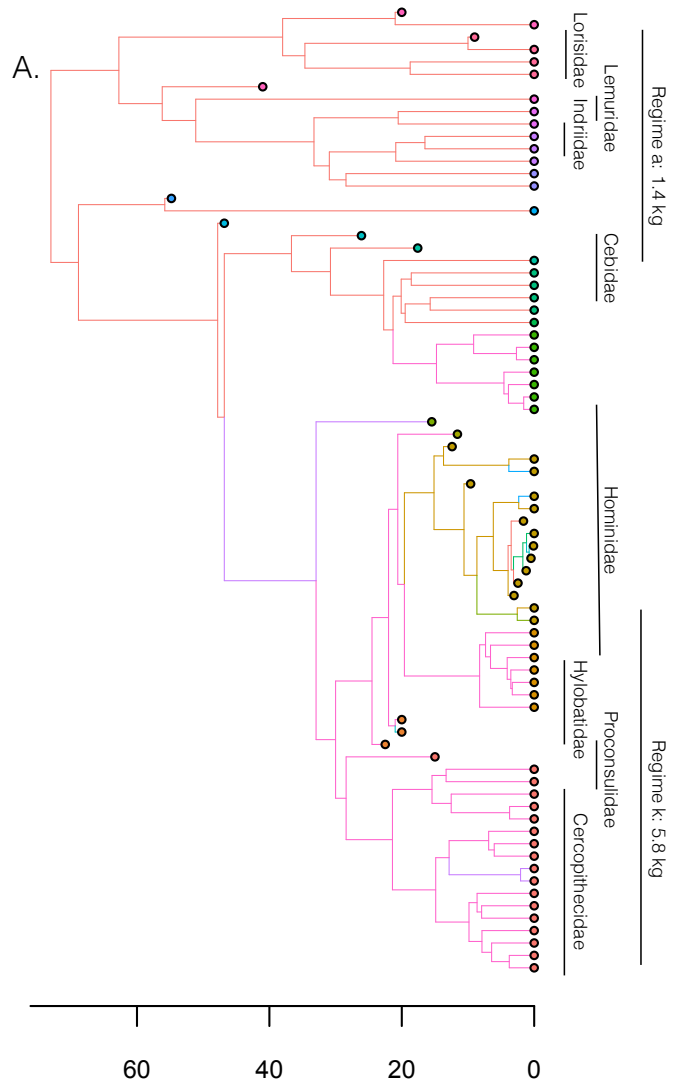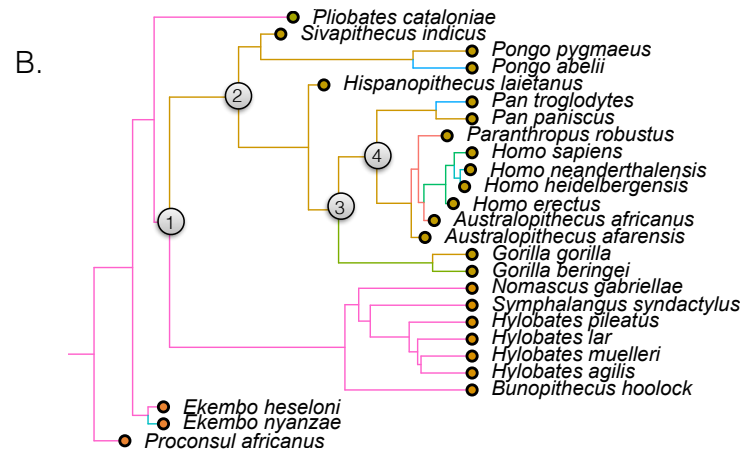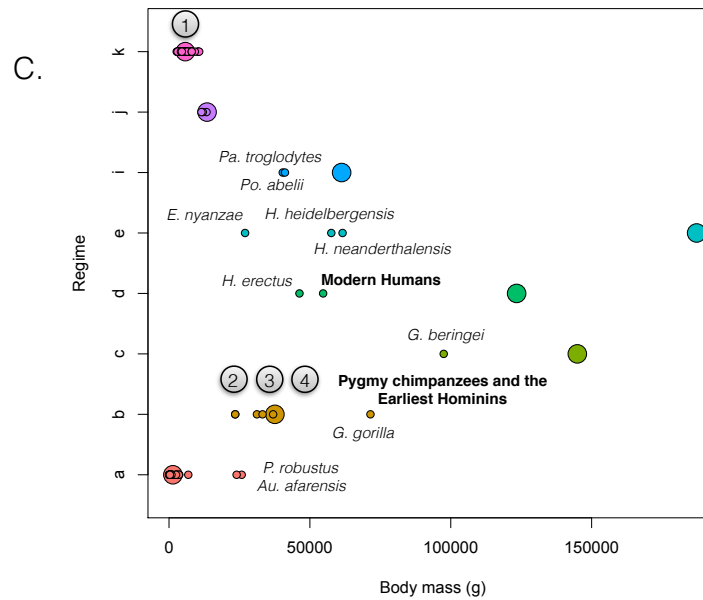

Supplementary Figure 5: Same as Figure 1 but with only female averages including well-sampled reliably-attributed early hominins.

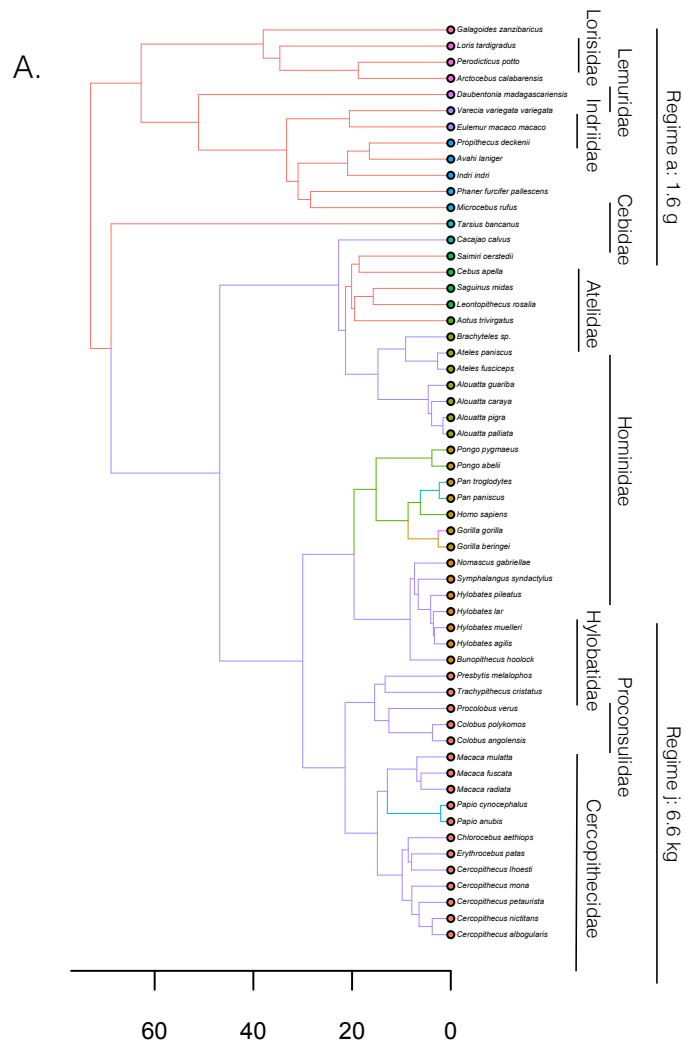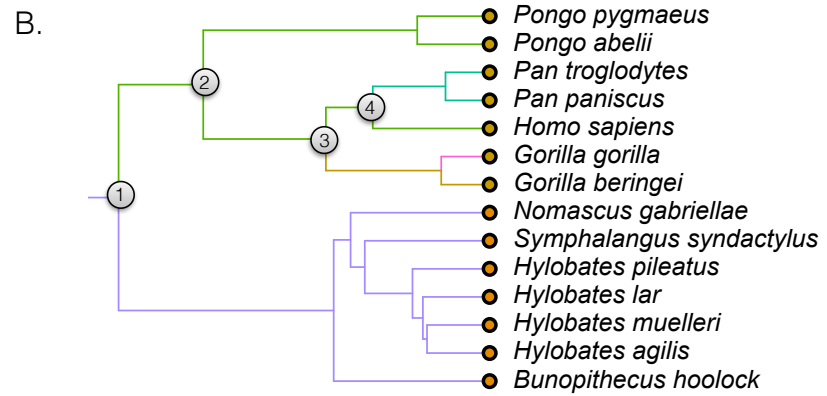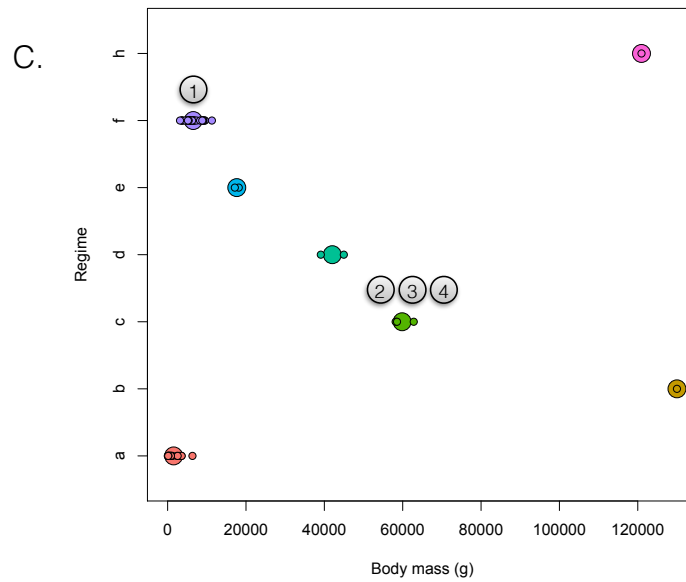

Supplementary Figure 6: Same as Figure 1 but with only extant primates.

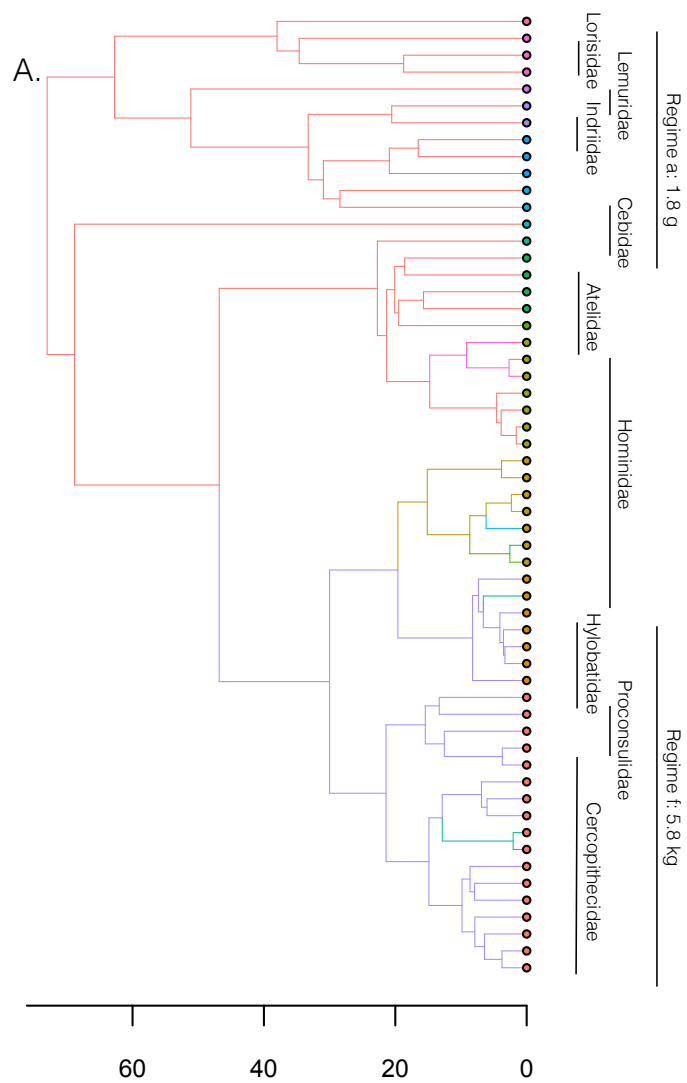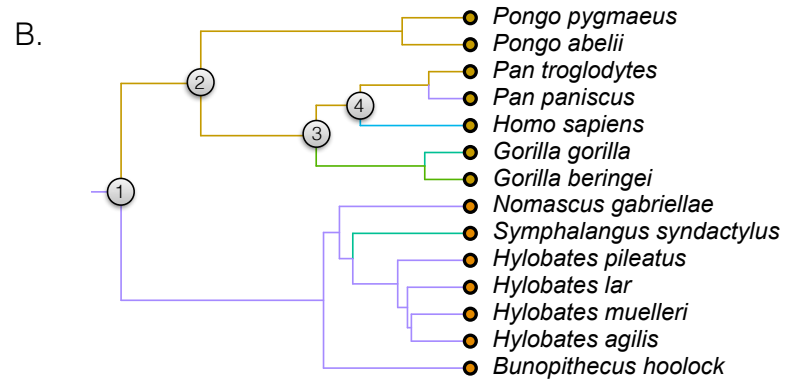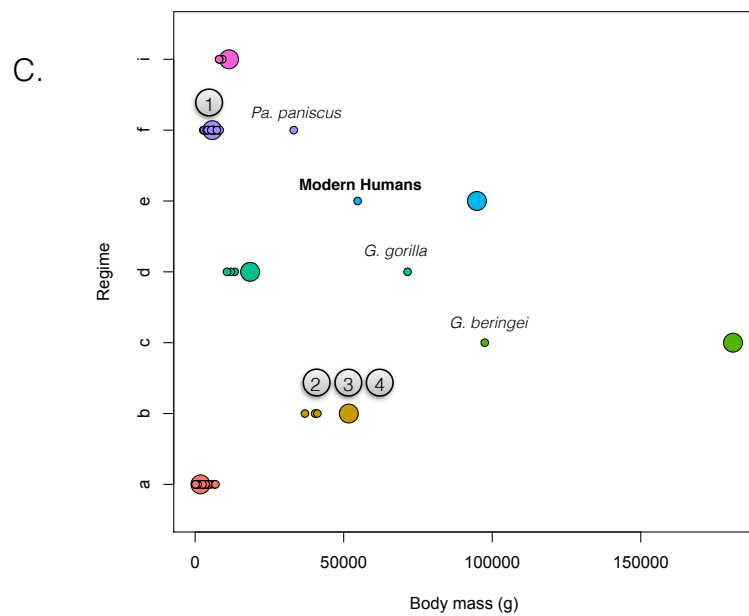

Supplementary Figure 7: Same as Figure 1 but with only extant female primates.

## Supplementary References

1. Grabowski, M., Hatala, K. G., Jungers, W. L. & Richmond, B. G. Body mass estimates of hominin fossils and the evolution of human body size. *J. Hum. Evol.* **85**, 75–93 (2015).
2. Almécija, S., Smaers, J. B. & Jungers, W. L. The evolution of human and ape hand proportions. *Nat. Commun.* **6**, 7717 (2015).
3. Arsuaga, J. L. *et al.* Postcranial morphology of the middle Pleistocene humans from Sima de los Huesos, Spain. *Proc. Natl. Acad. Sci.* **112**, 11524–11529 (2015).
4. Ruff, C. B., Trinkaus, E. & Holliday, T. W. Body mass and encephalization in Pleistocene *Homo*. *Nature* **387**, 173–176 (1997).
5. Harrison, T. in *Cenozoic Mammals of Africa* (eds. Werdelin, L. & Sanders, W. J.) 429–469 (University of California Press, 2010).
6. Moyà-Solà, S. *et al.* First partial face and upper dentition of the Middle Miocene hominoid i from Abocador de Can Mata (Vallès-Penedès Basin, Catalonia, NE Spain): taxonomic and phylogenetic implications. *Am. J. Phys. Anthropol.* **139**, 126–145 (2009).
7. Alba, D. M., Almécija, S., Casanovas-Vilar, I., Méndez, J. M. & Moyà-Solà, S. A partial skeleton of the fossil great ape *Hispanopithecus laietanus* from Can Feu and the mosaic evolution of crown-hominoid positional behaviors. **7**, e39617 (2012).
8. Morgan, M. E. *et al.* A partial hominoid innominate from the Miocene of Pakistan: description and preliminary analyses. *Proc. Natl. Acad. Sci.* **112**, 82–87 (2015).
9. Alba, D. M. *et al.* Miocene small-bodied ape from Eurasia sheds light on hominoid evolution. *Science* **350**, aab2625–aab2625 (2015).
10. Steiper, M. E. & Seiffert, E. R. Evidence for a convergent slowdown in primate molecular rates and its implications for the timing of early primate evolution. *Proc. Natl. Acad. Sci.* **109**, 6006–6011 (2012).
11. Seiffert, E. R., Simons, E. L. & Attia, Y. Fossil evidence for an ancient divergence of lorises and galagos. *Nature* **422**, 421–424 (2003).
12. Harrison, T. New postcranial remains of *Victoriapithecus* from the middle Miocene of Kenya. *J. Hum. Evol.* **18**, 3–54 (1989).
13. Ni, X. *et al.* The oldest known primate skeleton and early haplorhine evolution. *Nature* **498**, 60–64 (2013).
14. Egi, N., Takai, M., Shigehara, N. & Tsubamoto, T. Body Mass Estimates for Eocene Eosimiid and Amphipithecoid Primates Using Prosimian and Anthropoid Scaling Models. *International Journal of Primatology* **25**, 211–236 (2004).
15. Smith, R. J. & Jungers, W. L. Body mass in comparative primatology. *J. Hum. Evol.* **32**, 523–559 (1997).
16. Almécija, S. *et al.* The femur of *Orrorin tugenensis* exhibits morphometric affinities with both Miocene apes and later hominins. *Nat. Commun.* **4**, 2888 (2013).
17. White, T. D. *et al.* *Ardipithecus ramidus* and the Paleobiology of Early Hominids. *Science* **326**, 64 (2009).
18. Leakey, M. G., Feibel, C. S., McDougall, I., Ward, C. & Walker, A. New specimens and confirmation of an early age for *Australopithecus anamensis*. *Nature* **393**, 62–66 (1998).
19. Leakey, R. E. New hominid fossils from the Koobi Fora formation in northern Kenya. *Nature* **261**, 574–576 (1976).
20. Herries, A. I. R. & Adams, J. W. Clarifying the context, dating and age range of the Gondolin hominins and *Paranthropus* in South Africa. *J. Hum. Evol.* **65**, 676–681 (2013).
21. Pickering, R. *et al.* *Australopithecus sediba* at 1.977 Ma and implications for the origins of

- the genus *Homo*. *Science* **333**, 1421–1423 (2011).
22. Feibel, C. S., Brown, F. H. & McDougall, I. Stratigraphic context of fossil hominids from the Omo Group deposits: northern Turkana Basin, Kenya and Ethiopia. *Am. J. Phys. Anthropol.* **78**, 595–622 (1989).
  23. Herries, A. I. R., Curnoe, D. & Adams, J. W. A multi-disciplinary seriation of early *Homo* and *Paranthropus* bearing palaeocaves in southern Africa. *Quaternary International* **202**, 14–28 (2009).
  24. Kimbel, W. H., Johanson, D. C. & Rak, Y. Systematic assessment of a maxilla of *Homo* from Hadar, Ethiopia. **103**, 235–262 (1997).
  25. Kimbel, W. H. & Villmoare, B. From *Australopithecus* to *Homo*: the transition that wasn't. *Philos Trans R Soc Lond B Biol Sci* **371**, 20150248–10 (2016).
  26. Sutikna, T. *et al.* Revised stratigraphy and chronology for *Homo floresiensis* at Liang Bua in Indonesia. *Nature* **532**, 366–369 (2016).
  27. Wagner, G. A., Maul, L. C., Löscher, M. & Schreiber, H. D. Mauer - the type site of *Homo heidelbergensis*: palaeoenvironment and age. *Quaternary Science Reviews* **30**, 1464–1473 (2011).
  28. Rink, W. J., Schwarcz, H. P., Smith, F. H. & Radovčić. ESR ages for Krapina hominids. *Nature* **378**, 24–24 (1995).
  29. McDougall, I., Brown, F. H. & Fleagle, J. G. Stratigraphic placement and age of modern humans from Kibish, Ethiopia. *Nature Publishing Group* **433**, 733–736 (2005).
  30. McNulty, K. P., Begun, D. R., Kelley, J., Manthi, F. K. & Mbua, E. N. A systematic revision of *Proconsul* with the description of a new genus of early Miocene hominoid. *J. Hum. Evol.* **84**, 42–61 (2015).
  31. Begun, D. R. in *The Primate Fossil Record* (ed. Hartwig, W. C.) 221–240 (2002).
  32. Fleagle, J. G. *Primate Adaptation and Evolution*. (Academic Press, 2013).
  33. Takai, M., Anaya, F., Shigehara, N. & Setoguchi, T. New fossil materials of the earliest new world monkey, *Branisella boliviana*, and the problem of platyrrhine origins. *Am. J. Phys. Anthropol.* **111**, 263–281 (2000).
  34. Gonzales, L. A., Benefit, B. R., McCrossin, M. L. & Spoor, F. Cerebral complexity preceded enlarged brain size and reduced olfactory bulbs in Old World monkeys. *Nat. Commun.* **6**, 1–9 (2015).
  35. Beard, K. C. & Wang, J. The eosimiid primates (Anthropoidea) of the Heti Formation, Yuanqu Basin, Shanxi and Henan Provinces, People's Republic of China. *J. Hum. Evol.* **46**, 401–432 (2004).
  36. Arnold, C., Matthews, L. J. & Nunn, C. L. The 10kTrees website: A new online resource for primate phylogeny. *Evol. Anthropol.* **19**, 114–118 (2010).
