# Supplementary material for: Evidence of a chimpanzee-sized ancestor of humans but a gibbon-sized ancestor of apes
Source: Springer Nature journal article supplement (doi:10.1038/s41467-017-00997-4), 2017-10-06
Supplement: 41467_2017_997_MOESM2_ESM.pdf [file 41467_2017_997_MOESM2_ESM.pdf]

**File Name:** Supplementary Data 1

**Description:** Phylogenetic tree used in main analysis with branch lengths.
