# Supplementary material for: Evidence of a chimpanzee-sized ancestor of humans but a gibbon-sized ancestor of apes
Source: PubMed Central journal article supplement (PMC5638852; doi:10.1038/s41467-017-00997-4), 2017-10-12

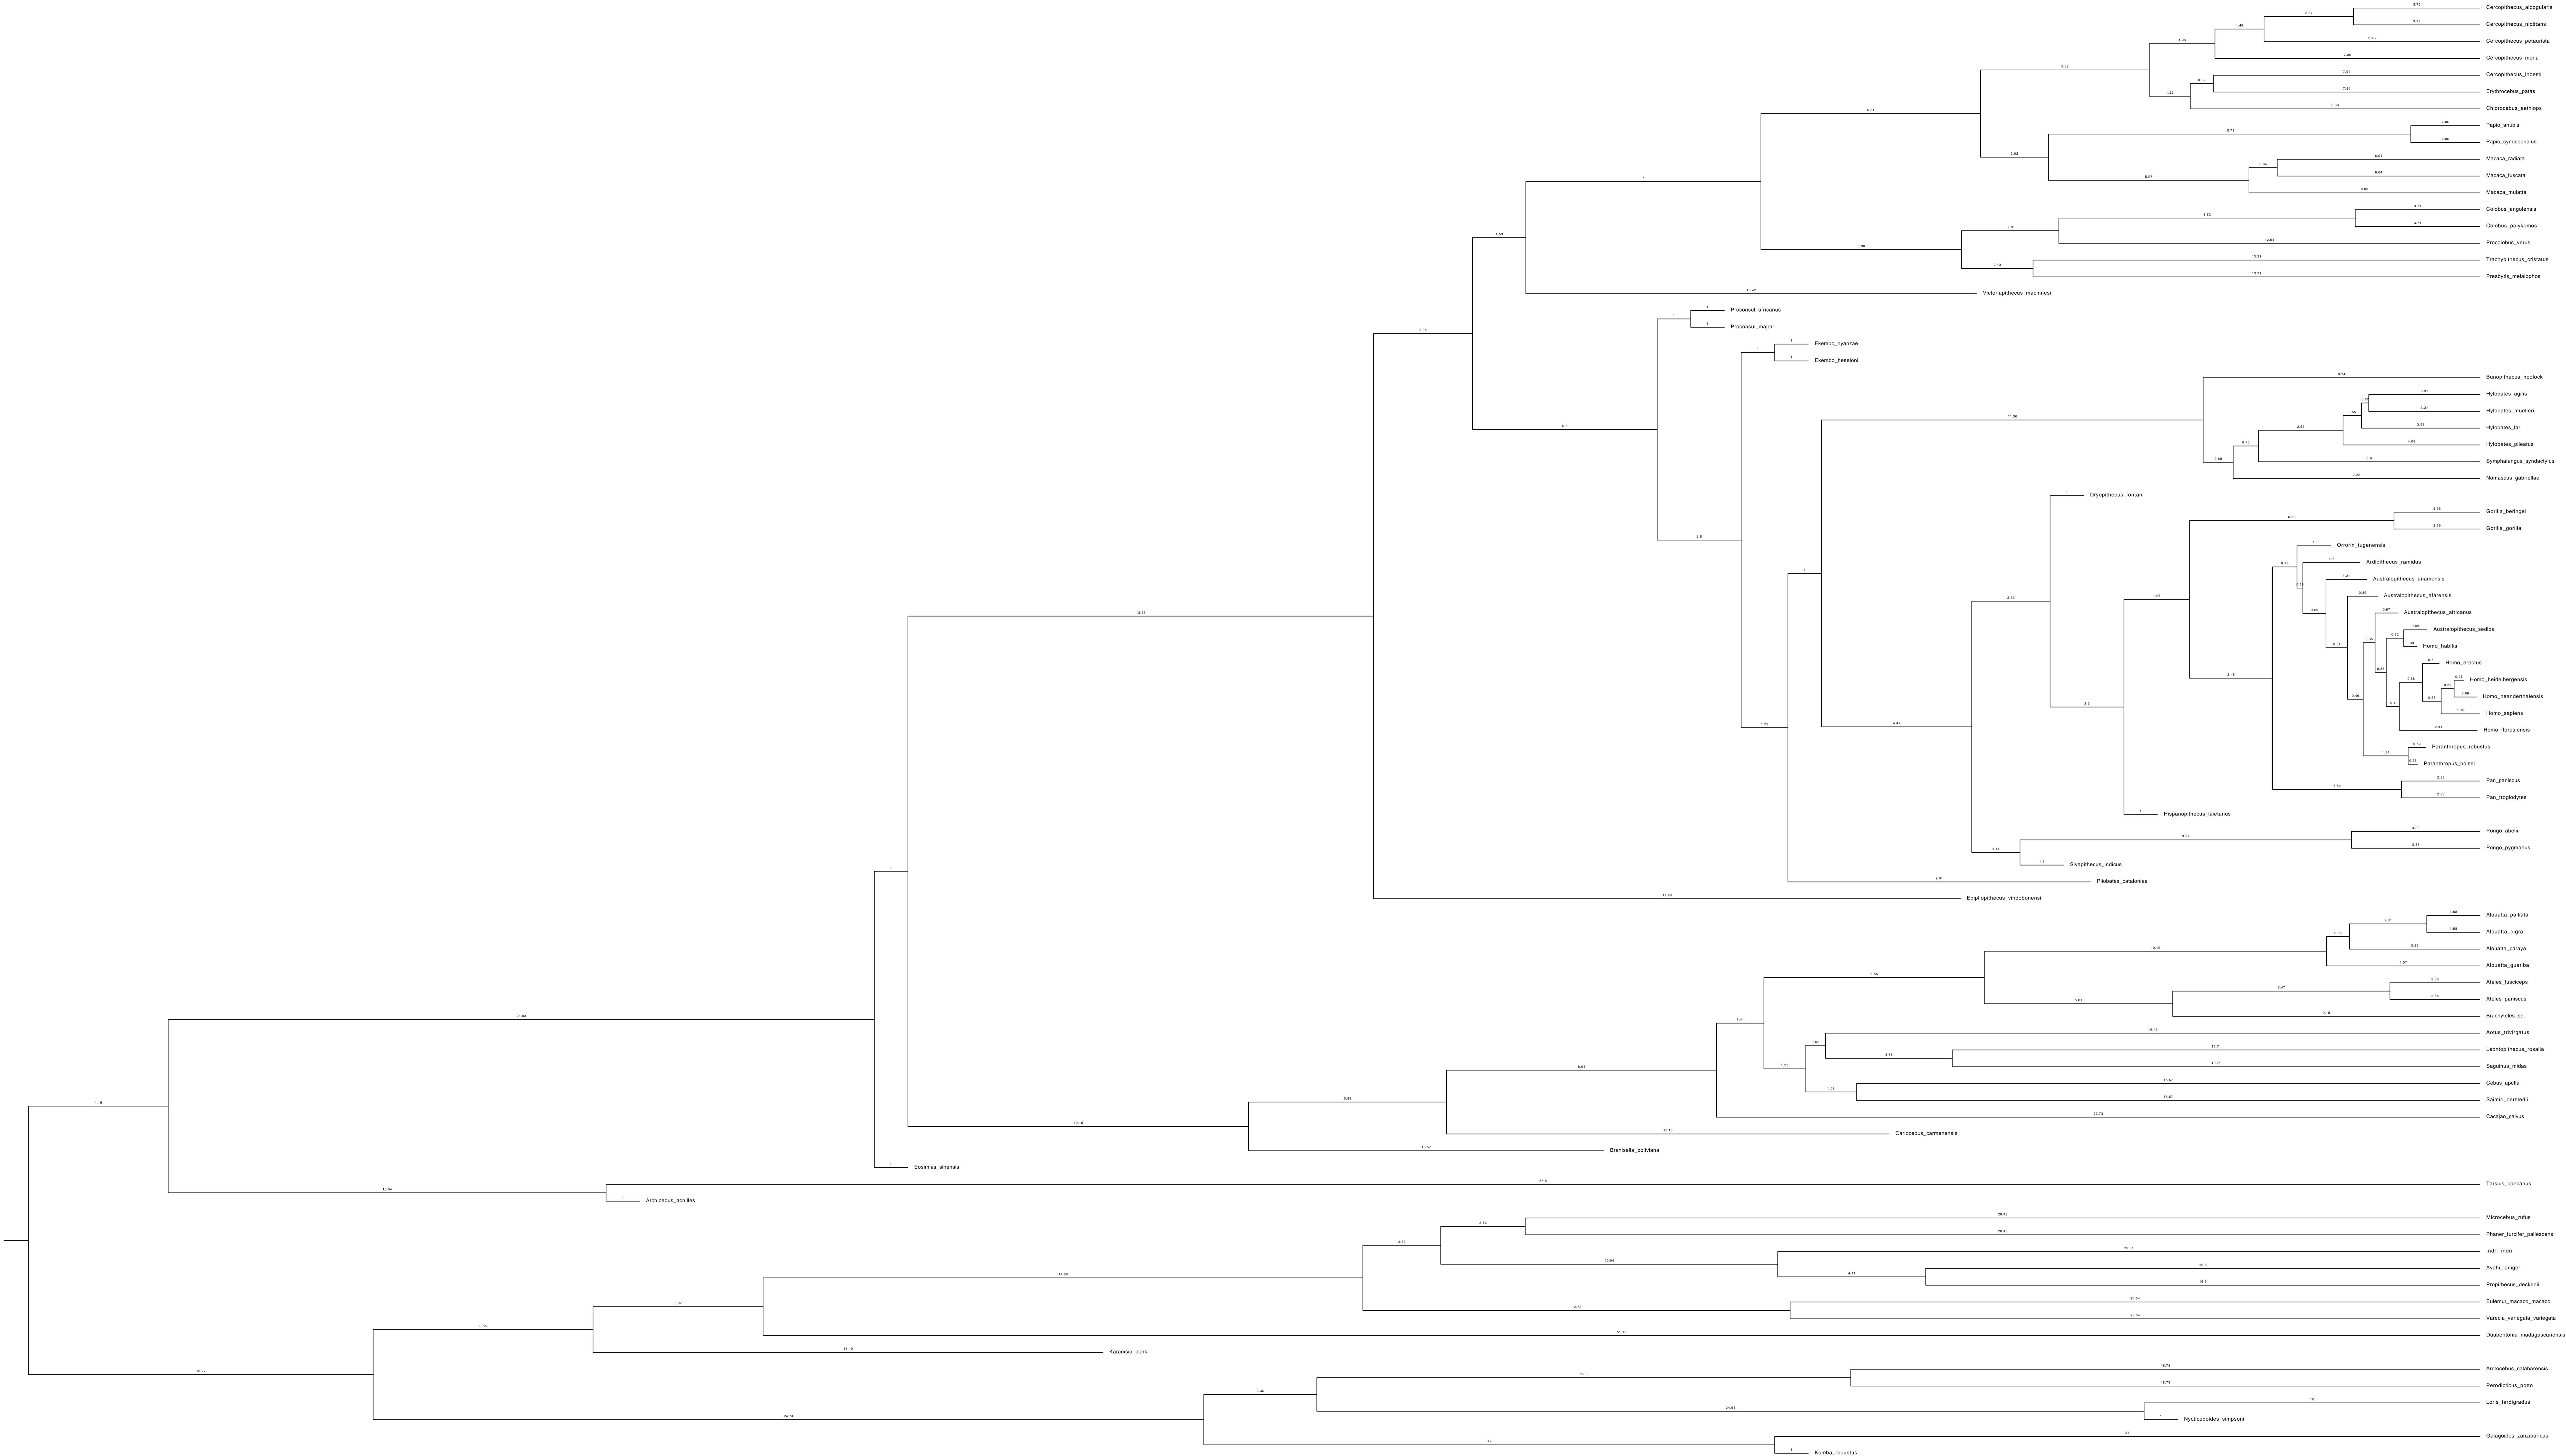

Supplement: 41467_2017_997_MOESM3_ESM.pdf [file 41467_2017_997_MOESM3_ESM.pdf]
